# Supplementary material
Source: PubMed Central journal article supplement (PMC7453151)
Supplement: bloodBLD2019003124-suppl1.pdf [file bloodBLD2019003124-suppl1.pdf]

## **SUPPLEMENTAL MATERIALS AND METHODS**

### **Drugs and antibodies**

Quizartinib (LC-Laboratories; Q-4799), gilteritinib (ChemieTek, Indianapolis, IN; CT-GILT), midostaurin (Sigma-Aldrich; M1323), sorafenib (LKT Laboratories, St Paul, MN; S5868), dexamethasone 21-acetate (Sigma-Aldrich; D1881), prednisolone (Sigma-Aldrich; P6004), triamcinolone (Sigma-Aldrich; T6376), MIK665 (ChemieTek; CT-MIK665), CHIR99021 (LC-laboratories; C-6556), and bortezomib (LC-laboratories; B-1408) were dissolved in DMSO. Antibodies were obtained from the following sources: MCL-1<sup>1</sup>; BCL-2<sup>1</sup>; Phospho-FLT3 (#3464), FLT3 (#3462), Phospho-STAT5 (#4322), Phospho-p42/44 MAPK (#4370), p42/44 MAPK (#4695),  $\beta$ -Catenin (#8480), Glucocorticoid Receptor (#3660) and BCL-XL (#2764) from Cell Signaling Technology (Danvers, MA); BIM (B7929),  $\beta$ -Actin (A5441) and  $\alpha$ -Tubulin (T5168) from Sigma-Aldrich.

### **Cell viability and apoptosis assays**

Dose response curves were performed by seeding 50000 cells/well in a 96-well plate and adding serially-diluted drugs or vehicle to each well, while maintaining a final DMSO concentration of 0.01%. Cell viability was measured using the CellTiter-Glo (Promega; Cat# G7570) assay according to the manufacturer's instruction. Single cell clones used for the dose response analysis shown in Supplemental Figure 1C were isolated using FACS sorter where single MV4-11 cells were sorted into each well of a 96-well plate and grown from a single cell.

Cell viability assessed by flow cytometry was performed by seeding 300000 cells/well in a 48-well plate, adding drug or vehicle to 500 $\mu$ l of media in each well, and incubated for the indicated durations of time. For combination matrix experiments, 60000 cells/well were seeded in a 96 well plate and treated with serial dilutions of drugs (DMSO concentration was kept below 0.01%) for 48h. Cells were stained with APC-Annexin V and 7-AAD (BioLegend, San Diego, CA) according to the manufacturer's protocol. FACSCanto 10 (BD) and FlowJo were used to run and analyze the stained cells.

Caspase-3/7 activity assay was done by seeding 60000 cells/well in a 96-well plate treated with 5 $\mu$ M Caspase-3/7 Green Detection Reagent (ThermoFisher Scientific; C10423) and

monitored using IncuCyte Live-Cell Analysis system (Sartorius, Göttingen, Germany) over a 24h period.

### **Immunoblotting**

An equal number of cells treated as described in the figure legends were flash frozen and lysed in 62.5 mM Tris-HCl (pH 6.8), 2% (w/v) SDS, 10% glycerol, 0.01% (w/v) bromophenol blue, and 41.7 mM dithiothreitol (Cell Signaling; #7722), sonicated on ice for 10 seconds and boiled at 100°C for 5 minutes. Lysates were subjected to electrophoresis followed by transfer to PVDF membrane and an overnight incubation with primary antibodies, followed by 1h incubation with fluorescent secondary antibodies (LI-COR, Lincoln, NE; #925-32210/11). Blots were scanned using a LI-COR Odyssey CLx Imager.

### **RNA sequencing and analysis**

MV4-11 cells were treated with DMSO for 48h, dexamethasone for 48h, quizartinib for 48h or 5d, and quizartinib plus dexamethasone for 48h or 5d (in which dexamethasone was added on day 3). RNA was extracted using the mirVana™ miRNA Isolation Kit (Thermo Fisher Scientific, Waltham, MA). cDNA libraries were prepared using the NEXTflex™ Illumina Rapid Directional RNA-Seq Library Prep Kit (BioO Scientific, Austin, TX) per the manufacturer's instructions and run on an Illumina HiSeq 2500. Reads that passed the Illumina CASAVA pipeline were aligned to the human reference genome (GRCh38) using STAR (v2.7.3)<sup>2</sup>, and gene and transcript quantifications are performed by RSEM against a gene annotation file, which contains by default GENCODE annotations (gencodeV24pri). Read counts were extracted, and used for differential expression analysis through edgeR<sup>2</sup> and DESEQ2<sup>3</sup> packages. Genes were first filtered by edgeR to remove non expressed genes in both DTPs and parental cells, then a significant false discovery rate of adjusted P value ( $p < 0.05$ ) were used for differential expression analysis from DESEQ2. Genes with 1.5-fold upregulation or downregulation in drug treated cells relative to DMSO control treated cells were used for core analysis with Ingenuity Pathway Analysis (IPA) software, Gene Ontology pathway analysis (using metascap<sup>4</sup>) and Protein-Protein Interaction (PPI) analysis to generate differential expression results for canonical pathways, upstream regulators, pathway analysis and drug-target prediction.

### ***In vivo* models of AML**

NOD-scid IL2rynull (NSG) mice were purchased from The Jackson Laboratory (Bar Harbor, ME) and maintained in compliance with guidelines and protocols approved by Penn State College of Medicine IACUC. Luciferase expressing MOLM13 cells (300,000 cells) were injected intravenously in to 6-week old male NSG mice. On day 12 (Figure 4C) or day 7 (Supplemental Figure 5B) post injection, engraftment was confirmed using IVIS Spectrum imaging system (PerkinElmer, Waltham, MA) and once daily oral treatment with vehicle (22% 2-Hydroxypropyl- $\beta$ -cyclodextrin; Sigma-Aldrich; C0926), quizartinib (2mg/kg; LC-Laboratories, Woburn, MA; Q-4799) or dexamethasone 21-phosphate disodium salt dissolved first in saline then in 22% 2-Hydroxypropyl- $\beta$ -cyclodextrin (10mg/kg; Sigma-Aldrich; D1159) (Figure 4C) or with vehicle, quizartinib (2 mg/kg) or dexamethasone 21 phosphate disodium salt (3 mg/kg) (Supplemental Figure 5B) alone or in combination was started and continued until the indicated end point. No bone marrow conditioning was performed prior to engraftment of MOLM13 cells.

Alternatively, MOLM13 cells (500,000 cells) were transplanted with Matrigel subcutaneously into the flank of 6-week old female NSG mice. Once palpable tumor grew in 10 days, treatment with vehicle (22% 2-Hydroxypropyl- $\beta$ -cyclodextrin; Sigma-Aldrich; C0926) and saline, quizartinib (oral 2mg/kg; LC-Laboratories, Woburn, MA; Q-4799) or dexamethasone 21-phosphate disodium salt dissolved in saline (IP 10mg/kg; Sigma-Aldrich; D1159) alone or in combination was initiated. Once daily treatment continued for a total of 20 days. On day 30 after cell injection, all mice were euthanized and tumor weight and volume measured.

### **CRISPR/Cas9 genome editing and MCL-1 overexpression**

Single guide RNA (gRNA) targeting GR (5'- AACCAAAAGTCTTCGCTGCT -3') or BIM (5'- AGGTAGACAATTGCAGCCTG -3') was sub-cloned into pLenti-CRISPR-V2 (Addgene, Watertown, MA; Plasmid #52961). The retroviral vector pMSCV-puro-Flag-mMcl-1<sup>KR</sup> was obtained through Addgene (Plasmid #32983). Lentiviral and retroviral packaging, transduction and puromycin selection were performed as described previously.<sup>5</sup> Single clones were isolated and screened for gene disruption by immunoblotting.

### **Supplemental References**

1. Krajewski S, Bodrug S, Gascoyne R, Berean K, Krajewska M, Reed JC.

- Immunohistochemical analysis of Mcl-1 and Bcl-2 proteins in normal and neoplastic lymph nodes. *Am J Pathol*. 1994;145(3):515-525.
2. Dobin A, Davis CA, Schlesinger F, et al. STAR: Ultrafast universal RNA-seq aligner. *Bioinformatics*. 2013;29(1):15-21. doi:10.1093/bioinformatics/bts635
  3. Robinson MD, McCarthy DJ, Smyth GK. edgeR: A Bioconductor package for differential expression analysis of digital gene expression data. *Bioinformatics*. 2009;26(1):139-140. doi:10.1093/bioinformatics/btp616
  4. Zhou Y, Zhou B, Pache L, et al. Metascape provides a biologist-oriented resource for the analysis of systems-level datasets. *Nat Commun*. 2019;10(1):1523. doi:10.1038/s41467-019-09234-6
  5. Tang Z, Takahashi Y, Chen C, et al. Atg2A/B deficiency switches cytoprotective autophagy to non-canonical caspase-8 activation and apoptosis. *Cell Death Differ*. 2017;24(12):2127-2138. doi:10.1038/cdd.2017.133

## SUPPLEMENTAL TABLES AND FIGURES

**Supplemental Table 1.** Compounds predicted to kill DTPs based on PPI analysis.

| <b>PubChem CID</b>              | <b>Targeted Genes</b>                             |
|---------------------------------|---------------------------------------------------|
| 3843095                         | H2BFS, HIST1H2AC, IGF1, LSP1, SH3TC, TF           |
| 7217946                         | CX3CR1, H2BFS, HIST1H2AC, LGALS2, LSP1, SORL1, TF |
| 60857                           | CX3CR1, HIST1H2AC, IGF1, KIT, LGALS2, SORL1       |
| 11201705                        | CX3CR1, H2BFS, HIST1H2AC, MYOM1, TF               |
| 2662 (Celecoxib)                | CX3CR1, H2BFS, HIST1H2AC, SLC14A1, SORL1          |
| 5702028                         | HCC515, HIST1H2AC, IGF1, SLC14A1, SORL1           |
| 6604780                         | CX3CR1, H2BFS, HIST1H2AC, PRUNE2, SORL1           |
| 5283389 (N-Arachidonoylglycine) | H2BFS, HIST1H2AC, SORL1, TF, ZNF467               |
| 2733526 (Tamoxifen)             | CX3CR1, H2BFS, HIST1H2AC, IGF1, SORL1             |
| 3136844                         | H2BFS, HIST1H2AC, IGF1, PRUNE2, SORL1             |

**Supplemental Table 2.** Top 20 chemicals predicted to regulate DTPs based on IPA analysis.

|    | <b>Upstream Regulator</b>                     | <b>Molecule Type</b>                | <b>Predicted Activation State</b> | <b>p-value of overlap</b> |
|----|-----------------------------------------------|-------------------------------------|-----------------------------------|---------------------------|
| 1  | fluticasone propionate                        | chemical drug                       |                                   | 5.14E-09                  |
| 2  | filgrastim                                    | biologic drug                       | Inhibited                         | 6.23E-09                  |
| 3  | dexamethasone                                 | chemical drug                       |                                   | 9.24E-08                  |
| 4  | salmonella minnesota R595 lipopolysaccharides | chemical - endogenous non-mammalian | Activated                         | 5.7E-06                   |
| 5  | lipopolysaccharide                            | chemical drug                       | Activated                         | 1.55E-05                  |
| 6  | 17-alpha-ethinylestradiol                     | chemical drug                       |                                   | 8.02E-05                  |
| 7  | tretinoin                                     | chemical - endogenous mammalian     | Activated                         | 9.36E-05                  |
| 8  | eicosapentenoic acid                          | chemical drug                       |                                   | 0.000406                  |
| 9  | prostaglandin D2                              | chemical - endogenous mammalian     | Activated                         | 0.000622                  |
| 10 | interferon beta-1a                            | biologic drug                       |                                   | 0.000628                  |
| 11 | genistein                                     | chemical drug                       | Activated                         | 0.000673                  |
| 12 | ATP-gamma-S                                   | chemical reagent                    |                                   | 0.000989                  |
| 13 | urea                                          | chemical - endogenous mammalian     |                                   | 0.00138                   |
| 14 | cholesterol                                   | chemical - endogenous mammalian     |                                   | 0.00149                   |
| 15 | adalimumab                                    | biologic drug                       |                                   | 0.00163                   |
| 16 | phloretin                                     | chemical - endogenous non-mammalian |                                   | 0.00163                   |
| 17 | C20-D3-vitamin A                              | chemical drug                       |                                   | 0.00163                   |
| 18 | mimosine                                      | chemical drug                       |                                   | 0.00186                   |
| 19 | 2-aminopurine                                 | chemical reagent                    |                                   | 0.00189                   |
| 20 | cholecalciferol                               | chemical - endogenous mammalian     |                                   | 0.00192                   |

**Supplemental Table 3.** Top 50 drugs that kill DTPs but not parental cells based on drug screening.

|    | <b>Drug</b>                           | <b>Therapeutic Effect</b> |
|----|---------------------------------------|---------------------------|
| 1  | Fludrocortisone acetate               | Anti-inflammatory         |
| 2  | Prednisolone                          | Anti-inflammatory         |
| 3  | Isoflupredone acetate                 | Anti-inflammatory         |
| 4  | 6-alpha-Methylprednisolone            | Anti-inflammatory         |
| 5  | Amodiaquine dihydrochloride dihydrate | Anti-inflammatory         |
| 6  | Triamcinolone                         | Anti-inflammatory         |
| 7  | Dexamethasone acetate                 | Anti-inflammatory         |
| 8  | Betamethasone                         | Anti-inflammatory         |
| 9  | Mometasone furoate                    | Anti-inflammatory         |
| 10 | Budesonide                            | Anti-inflammatory         |
| 11 | Diflorasone Diacetate                 | Anti-inflammatory         |
| 12 | Cortisol acetate                      | Anti-inflammatory         |
| 13 | Alclometasone dipropionate            | Anti-inflammatory         |
| 14 | Clobetasol propionate                 | Anti-inflammatory         |
| 15 | (R)-Naproxen sodium salt              | Anti-inflammatory         |
| 16 | Flunisolide                           | Anti-inflammatory         |
| 17 | Flurandrenolide                       | Anti-inflammatory         |
| 18 | Flumethasone                          | Anti-inflammatory         |
| 19 | Fluocinonide                          | Anti-inflammatory         |
| 20 | Halcinonide                           | Anti-inflammatory         |
| 21 | Beclomethasone dipropionate           | Anti-inflammatory         |
| 22 | Deflazacort                           | Anti-inflammatory         |
| 23 | Fluorometholone                       | Anti-inflammatory         |
| 24 | Prednicarbate                         | Anti-Inflammatory         |
| 25 | Amcinonide                            | Anti-inflammatory         |
| 26 | Clocortolone pivalate                 | Anti-inflammatory         |
| 27 | Rimexolone                            | Anti-inflammatory         |
| 28 | Fluticasone propionate                | Anti-inflammatory         |
| 29 | Fluocinolone acetonide                | Anti-inflammatory         |
| 30 | Fulvestrant                           | Antineoplastic            |
| 31 | Dipyridamole                          | Anticoagulant             |
| 32 | Flunarizine dihydrochloride           | Anticonvulsant            |
| 33 | Tolnaftate                            | Antifungal                |
| 34 | Fluphenazine dihydrochloride          | Antipsychotic             |
| 35 | Pimethixene maleate                   | Antihistaminic            |
| 36 | Dilazep dihydrochloride               | Antiplatelet              |
| 37 | Thioridazine hydrochloride            | Antipsychotic             |
| 38 | Mizolastine                           | Antihistaminic            |

|    |                                  |                  |
|----|----------------------------------|------------------|
| 39 | Vatalanib                        | Antineoplastic   |
| 40 | Amiodarone hydrochloride         | Antianginal      |
| 41 | Sertindole                       | Antipsychotic    |
| 42 | Butoconazole nitrate             | Antibacterial    |
| 43 | Raloxifene hydrochloride         | Antisteoporotic  |
| 44 | (±)-Metoprolol (+)-tartrate salt | Antiarrhythmic   |
| 45 | Estrone                          | Antimenopausal   |
| 46 | Fluspirilen                      | Antipsychotic    |
| 47 | Megestrol acetate                | Antineoplastic   |
| 48 | Aprepitant                       | Antiemetic       |
| 49 | Folinic acid calcium salt        | Antianemic       |
| 50 | Proadifen hydrochloride          | Local anesthetic |



**Supplemental Table 4.** Top 20 transcription regulators predicted to be upstream regulators of the up-regulated genes in quizartinib treated cells based on IPA analysis.

|    | <b>Upstream Regulator</b> | <b>Molecule Type</b>    | <b>Predicted Activation State</b> | <b>p-value of overlap</b> |
|----|---------------------------|-------------------------|-----------------------------------|---------------------------|
| 1  | CIITA                     | transcription regulator | Activated                         | 2.482                     |
| 2  | MAFB                      | transcription regulator | Activated                         | 2.713                     |
| 3  | BCOR                      | transcription regulator |                                   |                           |
| 4  | TYROBP                    | transmembrane receptor  | Activated                         | 2.213                     |
| 5  | STAT1                     | transcription regulator | Activated                         | 3.165                     |
| 6  | IRF8                      | transcription regulator |                                   | 1.733                     |
| 7  | IKZF1                     | transcription regulator |                                   | -0.97                     |
| 8  | CD2                       | transmembrane receptor  | Activated                         | 2.646                     |
| 9  | RFX5                      | transcription regulator |                                   |                           |
| 10 | BTNL2                     | transmembrane receptor  | Activated                         | 2.828                     |
| 11 | RAD21                     | transcription regulator | Activated                         | 2                         |
| 12 | PRDM1                     | transcription regulator |                                   | -1.267                    |
| 13 | IKZF3                     | transcription regulator | Inhibited                         | -2.449                    |
| 14 | IRF1                      | transcription regulator | Activated                         | 2.359                     |
| 15 | ZBTB16                    | transcription regulator |                                   | -0.936                    |
| 16 | ZBTB32                    | transcription regulator |                                   |                           |
| 17 | CEBPD                     | transcription regulator |                                   | 0.4                       |
| 18 | STAT6                     | transcription regulator |                                   | -0.522                    |
| 19 | STAT3                     | transcription regulator |                                   | 0.572                     |
| 20 | SPI1                      | transcription regulator | Activated                         | 2.428                     |

**Supplemental Table 5.** Top 20 cytokines and complex predicted to be upstream regulators of the up-regulated genes in quizartinib treated cells based on IPA analysis.

|    | <b>Upstream Regulator</b> | <b>Molecule Type</b> | <b>Predicted Activation State</b> | <b>p-value of overlap</b> |
|----|---------------------------|----------------------|-----------------------------------|---------------------------|
| 1  | EBI3                      | cytokine             | Activated                         | 6.47E-07                  |
| 2  | IL27                      | cytokine             | Activated                         | 1.94E-06                  |
| 3  | IFNG                      | cytokine             |                                   | 2.88E-06                  |
| 4  | IL10                      | cytokine             | Activated                         | 7.45E-06                  |
| 5  | TNF                       | cytokine             | Activated                         | 1.12E-05                  |
| 6  | IL13                      | cytokine             |                                   | 7.89E-05                  |
| 7  | Ige                       | complex              | Activated                         | 0.000131                  |
| 8  | IL15                      | cytokine             |                                   | 0.000144                  |
| 9  | IL12 (complex)            | complex              | Activated                         | 0.00396                   |
| 10 | IL18                      | cytokine             | Activated                         | 0.00402                   |
| 11 | IFNA1/IFNA13              | cytokine             | Activated                         | 0.0101                    |
| 12 | IL1B                      | cytokine             |                                   | 0.00101                   |
| 13 | IL21                      | cytokine             | Activated                         | 0.00103                   |
| 14 | IL2                       | cytokine             | Activated                         | 0.00115                   |
| 15 | BCR (complex)             | complex              |                                   | 0.00137                   |
| 16 | NFkB (complex)            | complex              | Activated                         | 0.00141                   |
| 17 | IL4                       | cytokine             |                                   | 0.00152                   |
| 18 | IL6                       | cytokine             |                                   | 0.00182                   |
| 19 | Inflammasome              | complex              |                                   | 0.0465                    |
| 20 | CSF1                      | cytokine             |                                   | 0.00207                   |

**Supplemental Table 6.** Top 20 transcription regulators predicted to be upstream regulators of the down-regulated genes in quizartinib plus dexamethasone treated cells based on IPA analysis.

|    | <b>Upstream Regulator</b> | <b>Molecule Type</b>    | <b>Predicted Activation State</b> | <b>p-value of overlap</b> |
|----|---------------------------|-------------------------|-----------------------------------|---------------------------|
| 1  | CIITA                     | transcription regulator | Inhibited                         | 1.77E-15                  |
| 2  | RFX5                      | transcription regulator |                                   | 7.25E-08                  |
| 3  | STAT3                     | transcription regulator |                                   | 8E-08                     |
| 4  | CTCF                      | transcription regulator | Inhibited                         | 2.01E-07                  |
| 5  | RAD21                     | transcription regulator | Inhibited                         | 2.09E-06                  |
| 6  | PRDM1                     | transcription regulator |                                   | 3.45E-06                  |
| 7  | SPI1                      | transcription regulator |                                   | 9.17E-06                  |
| 8  | CEBPE                     | transcription regulator |                                   | 1.44E-05                  |
| 9  | BCOR                      | transcription regulator |                                   | 2.63E-05                  |
| 10 | STAT1                     | transcription regulator |                                   | 6.76E-05                  |
| 11 | NFKB2                     | transcription regulator | Inhibited                         | 6.98E-05                  |
| 12 | TCL1A                     | transcription regulator |                                   | 0.000111                  |
| 13 | HOXA10                    | transcription regulator | Activated                         | 0.000149                  |
| 14 | NKX2-1                    | transcription regulator |                                   | 0.000157                  |
| 15 | RFXAP                     | transcription regulator |                                   | 0.000271                  |
| 16 | ZEB2                      | transcription regulator |                                   | 0.00046                   |
| 17 | ZBTB32                    | transcription regulator |                                   | 0.000494                  |
| 18 | IRF8                      | transcription regulator |                                   | 0.000645                  |
| 19 | SIRT1                     | transcription regulator |                                   | 0.00094                   |
| 20 | TBX21                     | transcription regulator |                                   | 0.000943                  |

**Supplemental Table 7.** Top 20 cytokines and complex predicted to be upstream regulators of the down-regulated genes in quizartinib plus dexamethasone treated cells based on IPA analysis.

|    | <b>Upstream Regulator</b>    | <b>Molecule Type</b> | <b>Predicted Activation State</b> | <b>p-value of overlap</b> |
|----|------------------------------|----------------------|-----------------------------------|---------------------------|
| 1  | Ige                          | complex              |                                   | -1.633                    |
| 2  | NFkB (complex)               | complex              | Inhibited                         | -2.2                      |
| 3  | BCR (complex)                | complex              |                                   | -1.982                    |
| 4  | CREB-NFkB                    | complex              |                                   |                           |
| 5  | HLA-B27                      | complex              |                                   |                           |
| 6  | Immunoglobulin               | complex              |                                   | 0.277                     |
| 7  | IL12 (complex)               | complex              |                                   |                           |
| 8  | IgG                          | complex              |                                   |                           |
| 9  | Bcl9-Cbp/p300-Ctnnb1-Lef/Tcf | complex              |                                   |                           |
| 10 | Ifn gamma                    | complex              |                                   |                           |
| 11 | CD3                          | complex              |                                   |                           |
| 12 | LDL                          | complex              |                                   |                           |
| 13 | Iga                          | complex              |                                   |                           |
| 14 | IL6                          | cytokine             |                                   | -0.877                    |
| 15 | CSF3                         | cytokine             |                                   | 1.569                     |
| 16 | IL27                         | cytokine             | Inhibited                         | -2.951                    |
| 17 | IFNG                         | cytokine             | Inhibited                         | -2.88                     |
| 18 | EBI3                         | cytokine             | Inhibited                         | -2.425                    |
| 19 | IL4                          | cytokine             | Inhibited                         | -2.586                    |
| 20 | TNFSF13B                     | cytokine             |                                   |                           |

**Supplemental Table 8.** Clinical characteristics of AML patients used in the study.

| <b>Code</b> | <b>Gender</b> | <b>Stage</b> | <b>Diagnosis</b> | <b>Cytogenetics</b> | <b>NPM1</b> | <b>FLT3</b> | <b>% Blast</b> | <b>RES</b> |
|-------------|---------------|--------------|------------------|---------------------|-------------|-------------|----------------|------------|
| 765         | M             | Dx           | AML              | t(16;16)            | N/A         | ITD         | 77.0           | Yes        |
| 791         | M             | Dx           | AML              | Normal              | Mut         | D835mut     | 64.0           | Yes        |
| 801         | M             | Dx           | AML              | Normal              | N/A         | ITD         | 22.4           | Yes        |
| 1224        | F             | Rel          | AML              | N/A                 | Mut         | ITD         | 66.0           | Yes        |
| 1244        | M             | Dx           | AML              | t(3;5)              | WT          | ITD         | 63.5           | Yes        |
| 1259        | F             | Rel          | AML              | Complex             | N/A         | WT          | N/A            | No         |
| 1335        | F             | Dx           | AML              | Normal              | N/A         | WT          | 34.0           | No         |
| 1340        | F             | Dx           | AML              | Normal              | N/A         | WT          | N/A            | No         |
| 1342        | M             | Dx           | AML              | N/A                 | WT          | WT          | N/A            | No         |
| 939         | F             | Dx           | AML              | Normal              | WT          | ITD         | 93.8           | No         |
| 1032        | F             | Rel          | AML              | Normal              | N/A         | ITD         | 74.5           | No         |
| 1172        | F             | Dx           | AML              | Normal              | WT          | ITD         | 96.0           | No         |
| 1265        | M             | Dx           | AML              | N/A                 | N/A         | ITD         | 96.0           | No         |

Dx: Diagnosis; Rel: Relapse; N/A: Not Available; Mut: Mutant; WT: Wild-type; RES: Response to quizartinib plus dexamethasone

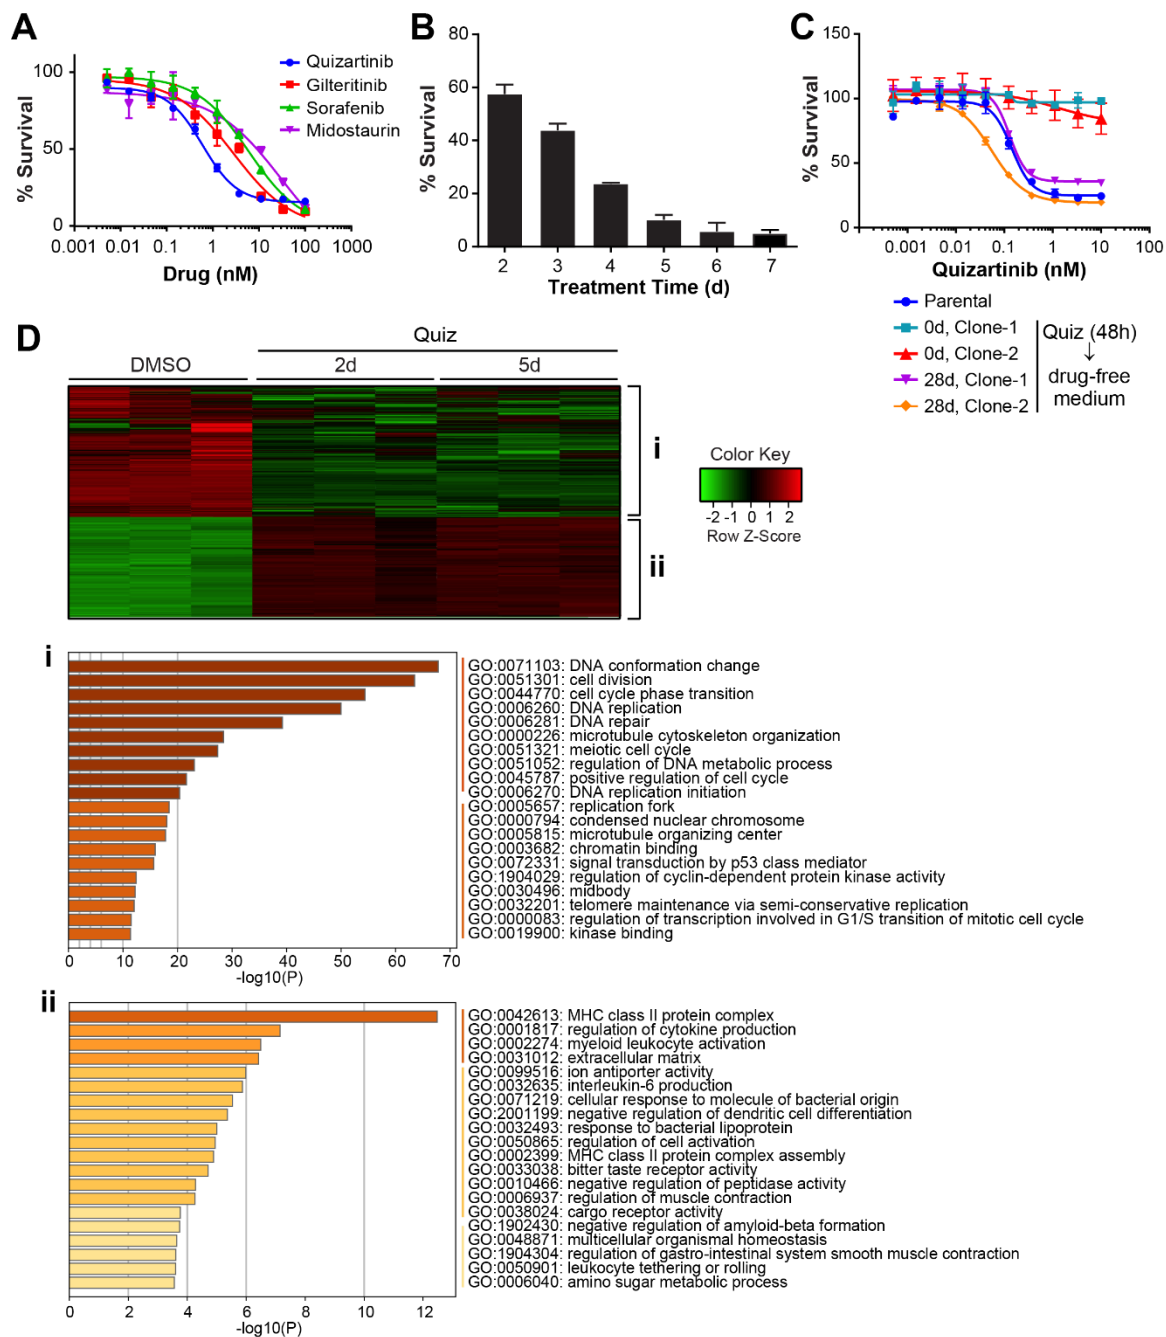

**Supplemental Figure 1.** (A) Survival curve showing the viability of MV4-11 cells treated with the indicated concentrations of FLT3 inhibitors for 48h using CellTiter-Glo assay. (B) MV4-11 cells were treated with 100nM quizartinib for the indicated durations of time, stained with APC-Annexin V and 7-AAD, and analyzed by FACS for detection of viable cells. (C) Single clone derived MV4-11 cells (isolated using the FACS sorter) were used to generate DTPs (quizartinib treatment for 48h). DTPs were subsequently used for survival curve analysis either immediately

following generation (0d) or after 28d culture in drug-free media. **(D)** A heat-map of differentially expressed genes (Green, down-regulated; Red, up-regulated) in MV4-11 cells treated with either DMSO or quizartinib (Quiz; 10nM) for either 2d or 5d. The surviving cells were isolated by Ficoll centrifugation before RNA-sequencing. RNA-seq was conducted in three biological replicates. Pathway analysis of down-regulated **(D-i)** and up-regulated **(D-ii)** genes.

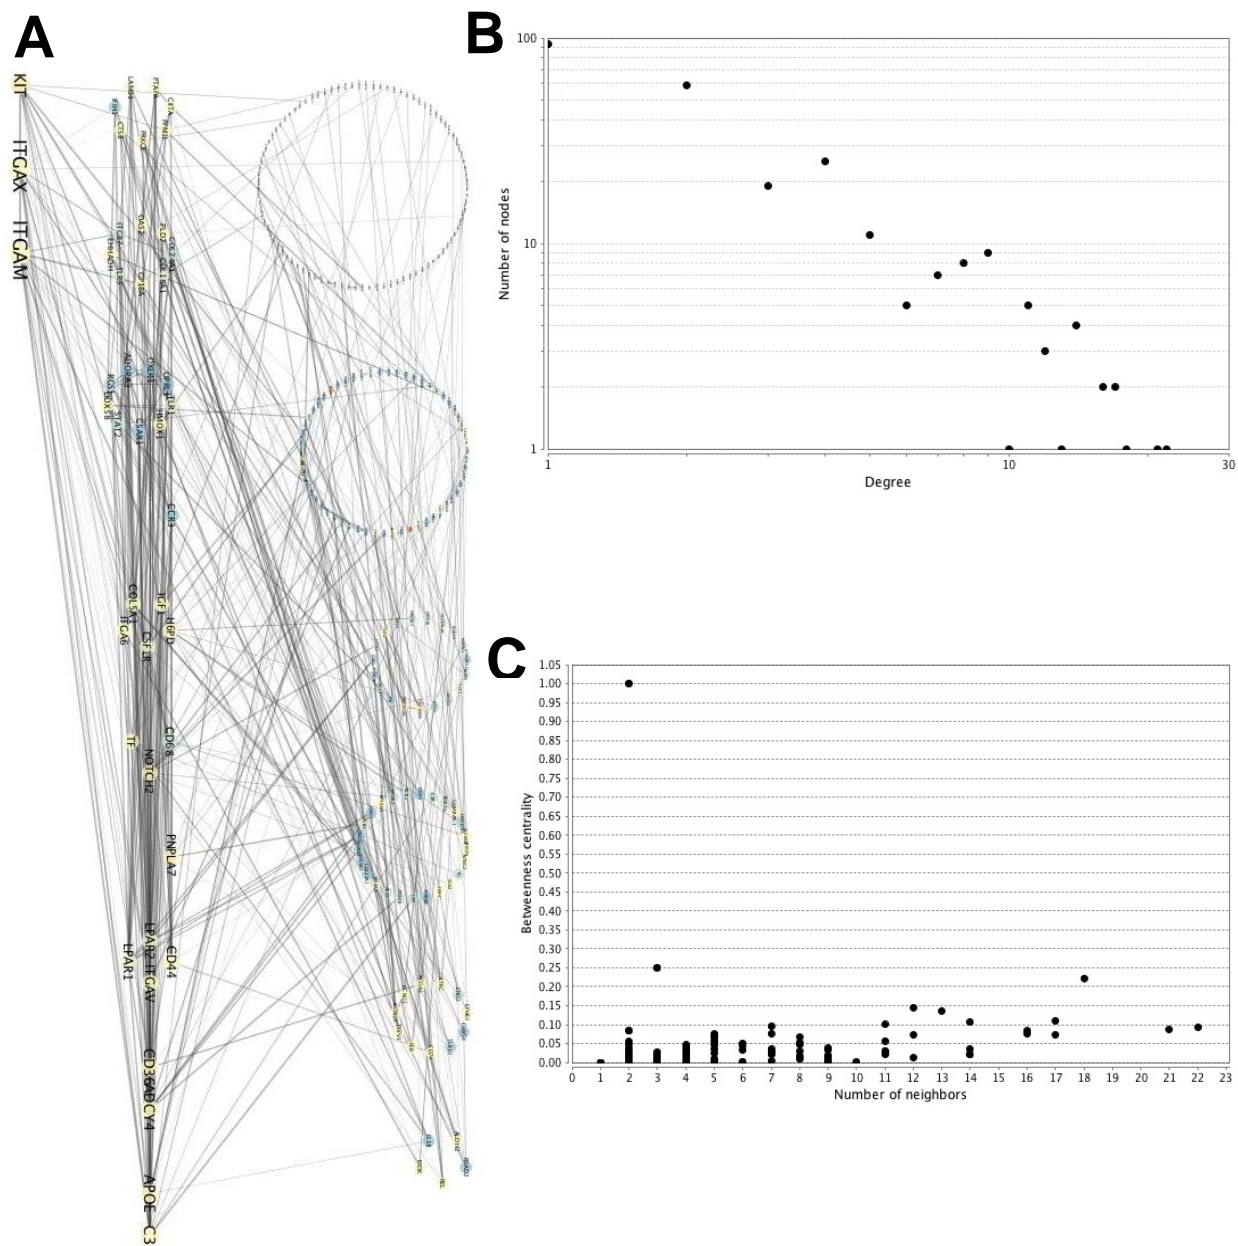

**Supplemental Figure 2.** (A) Protein-protein interaction network. Nodes are grouped based on node degree. The node size is mapped to the node degree (low values to small sizes). The node color is mapped to the betweenness centrality (low values to dark colors). The edge size is mapped to the combined interaction score (low values to small size). (B) Network hubs. Nodes with high node degree (the number of interactions that a node has). List of nodes with high node degree ( $\geq 10$ ) in the PPI network: ITGAM (22), ITGAX (21), KIT (18), C3 (17), APOE (17), ADCY4 (16), CD36 (16), ITGAV (14), LPAR1 (14), LPAR2 (14), CD44 (14), PNPLA7 (13), NOTCH2



(12), TF (12), CD68 (12), CSF1R (11), ITGA6 (11), COL5A1 (11), IGF1 (11), H6PD (11), CCR3 (10). **(C) Network bottlenecks.** Nodes with high betweenness centrality (an indicator of a node's centrality in a network). List of nodes with high betweenness centrality in the PPI network: BAIAP2 (1), GNS (1), HIST1H2BK (0.25), HIST1H2AC (0.25), KIT (0.22), NOTCH2 (0.15), PNPLA7 (0.14), C3 (0.11), CD44 (0.11), H6PD (0.1), PRKCE (0.095), ITGAM (0.093), ITGAX (0.087), CD36 (0.084), HIST2H2BE (0.083), HIST1H2AG (0.083).

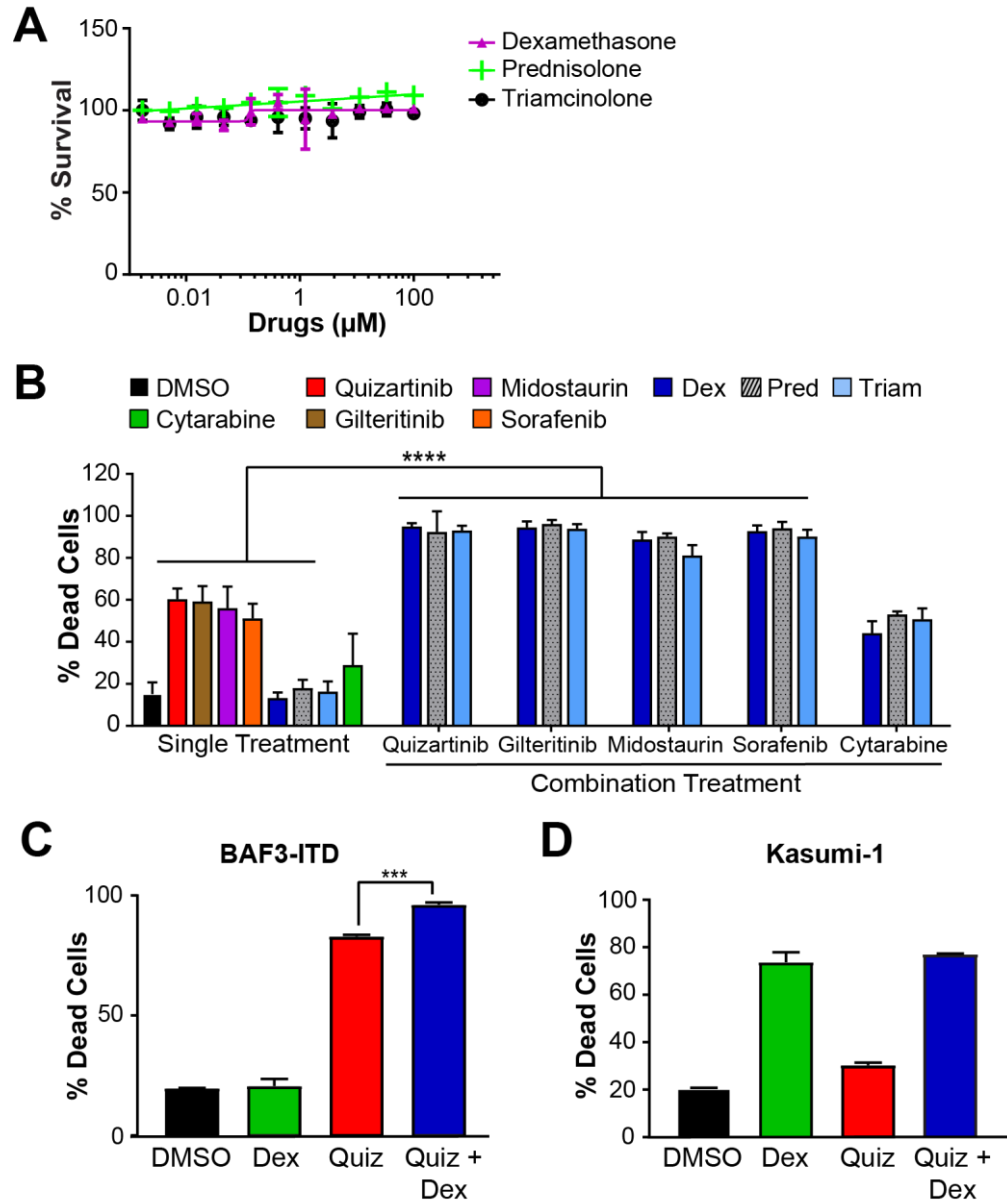

**Supplemental Figure 3.** (A) Survival curve showing the viability of MV4-11 cells treated with the indicated concentrations of anti-inflammatory GCs. (B) FACS analysis of replicate experiments to quantify dead cells (Annexin V and 7-AAD positive) for the indicated drug combinations (100nM FLT3 inhibitors, 1 $\mu\text{M}$  cytarabine and 50 $\mu\text{M}$  GCs) in MOLM13 cells (C), FACS analysis of BAF3-FLT3-ITD (C) and Kasumi-1 (D) cell viability following treatment with quizartinib (Quiz; 100nM) alone or in combination with dexamethasone (Dex; 50 $\mu\text{M}$ ) for 48h.

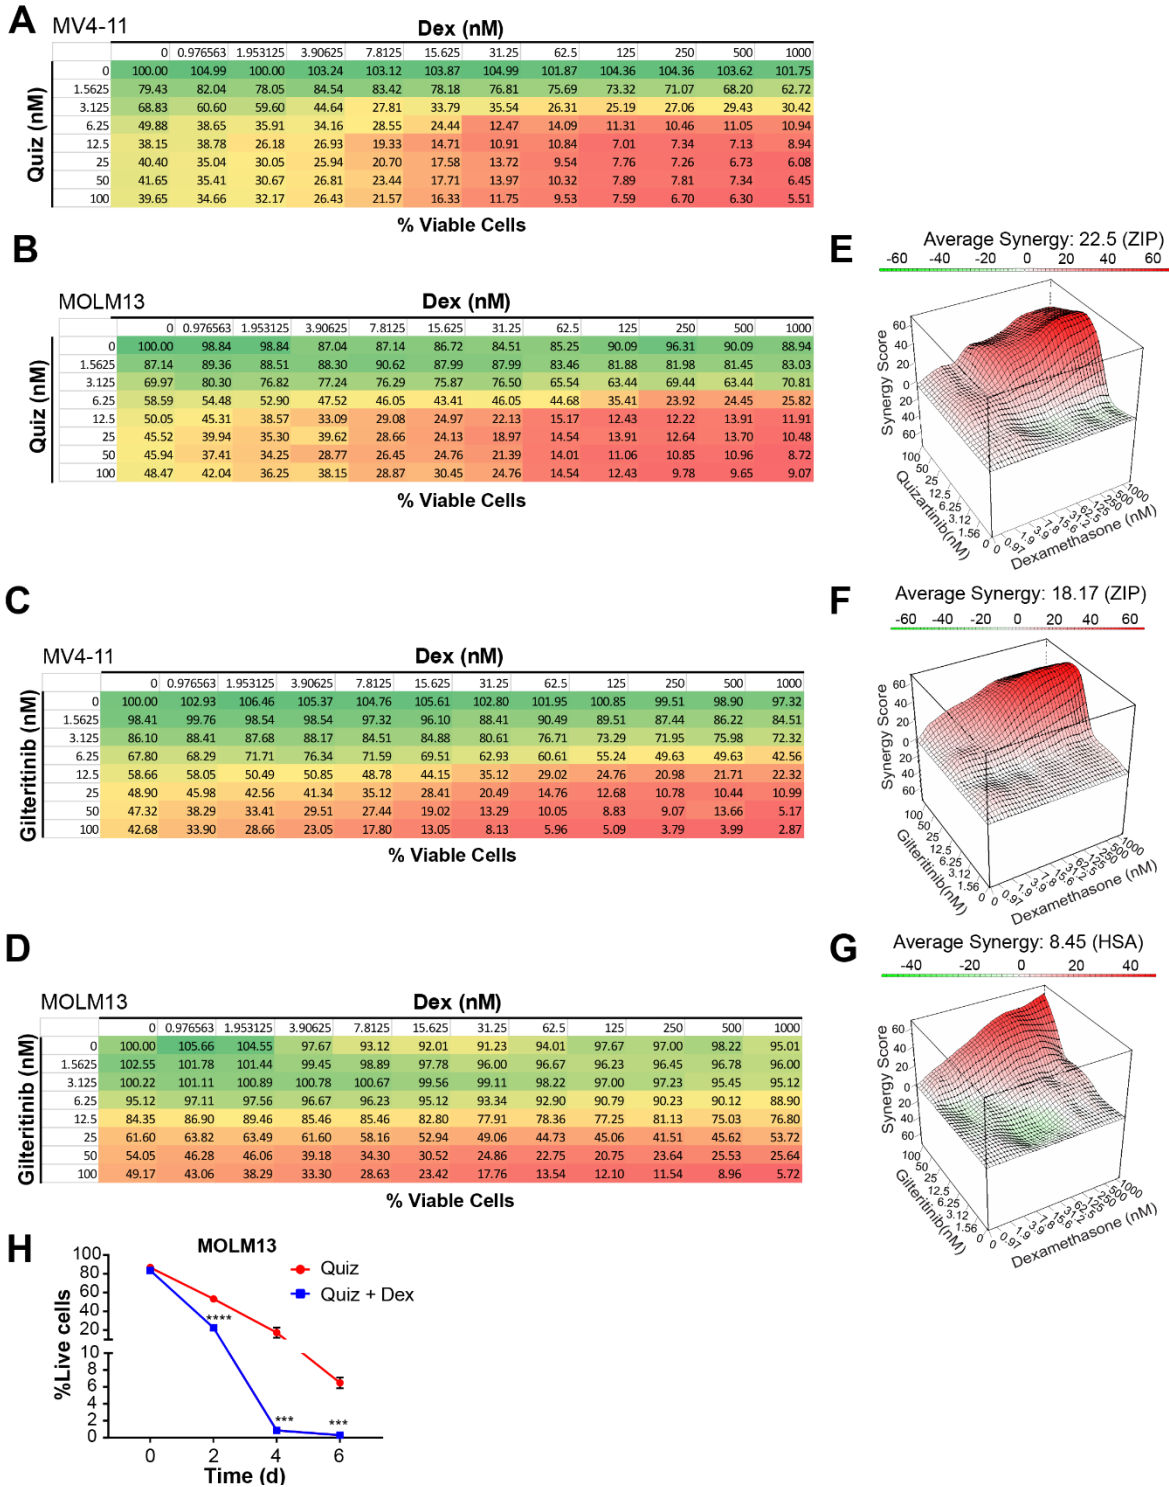

**Supplemental Figure 4.** Table showing the drug combination matrix of serially diluted quizartinib and dexamethasone in MV4-11 (A) and MOLM13 (B) cells. Table showing the drug combination matrix of serially diluted gilteritinib and dexamethasone in MV4-11 (C) and MOLM13 (D) cells.

(E) Three-dimensional graph showing the synergy score of quizartinib and dexamethasone combination in MOLM13 cells. Three-dimensional graph showing the synergy score of gilteritinib and dexamethasone combination in MV4-11 (F) and MOLM13 (G) cells. (H) Quantification of viable MOLM13 cells (Annexin V and 7-AAD negative) using FACS analysis for the indicated time points after quizartinib (Quiz; 10nM)  $\pm$  dexamethasone (100nM) treatment.

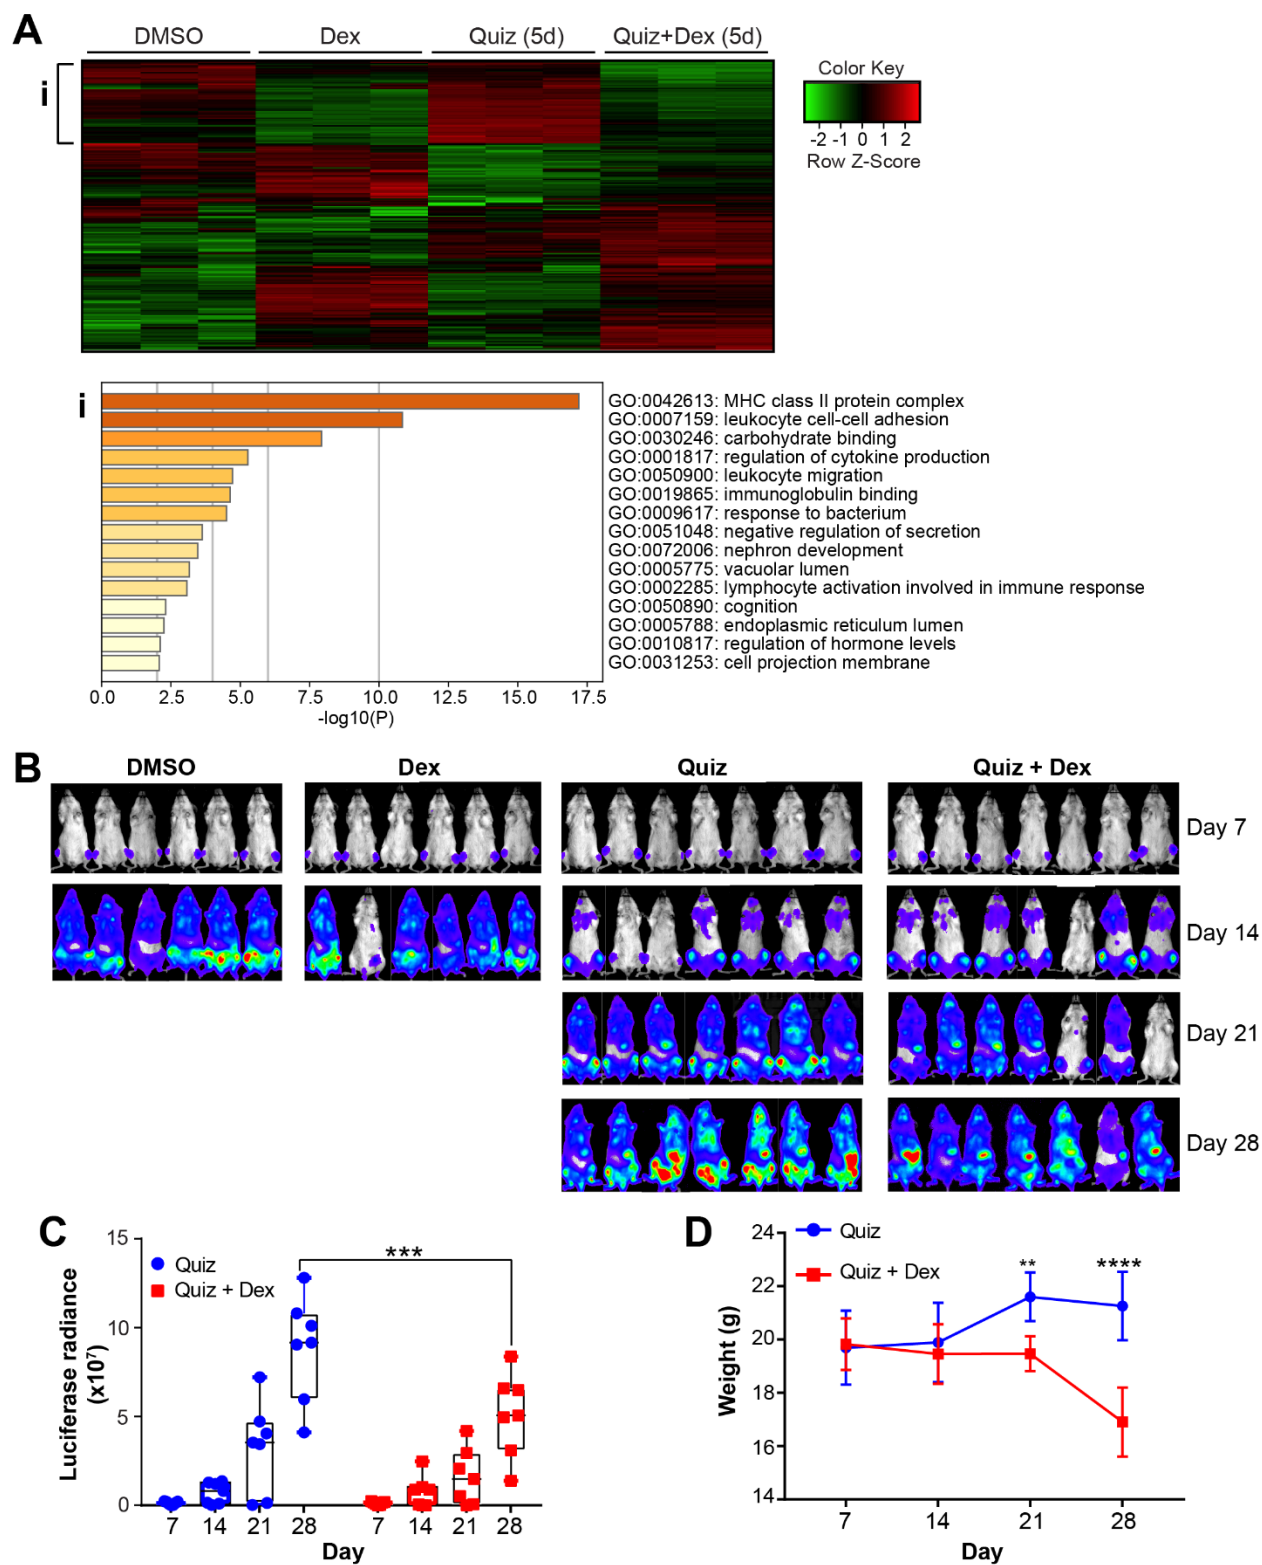

**Supplemental Figure 5.** A heat-map of differentially expressed genes (Green, down-regulated; Red, up-regulated) in MV4-11 cells treated with 10nM quizartinib (Quiz) for 5d and 100nM

dexamethasone for 2d (Dex). For the combination treatment, cells were treated with 10nM quizartinib for 5d and 100nM dexamethasone was added on day 3. **(A-i)** Pathway analysis of genes up-regulated in quizartinib treated cells and down-regulated in cells treated with the combination of quizartinib and dexamethasone. RNA-seq was conducted in 3 biological replicates. **(B)** *In vivo* bioluminescence imaging, **(C)** Luciferase signal quantification, and **(D)** Body weight tracking were performed at the indicated time points on NSG mice xenografted with MOLM13-Luc cells and treated with vehicle or the indicated drugs (2mg/kg quizartinib; 3mg/kg dexamethasone).

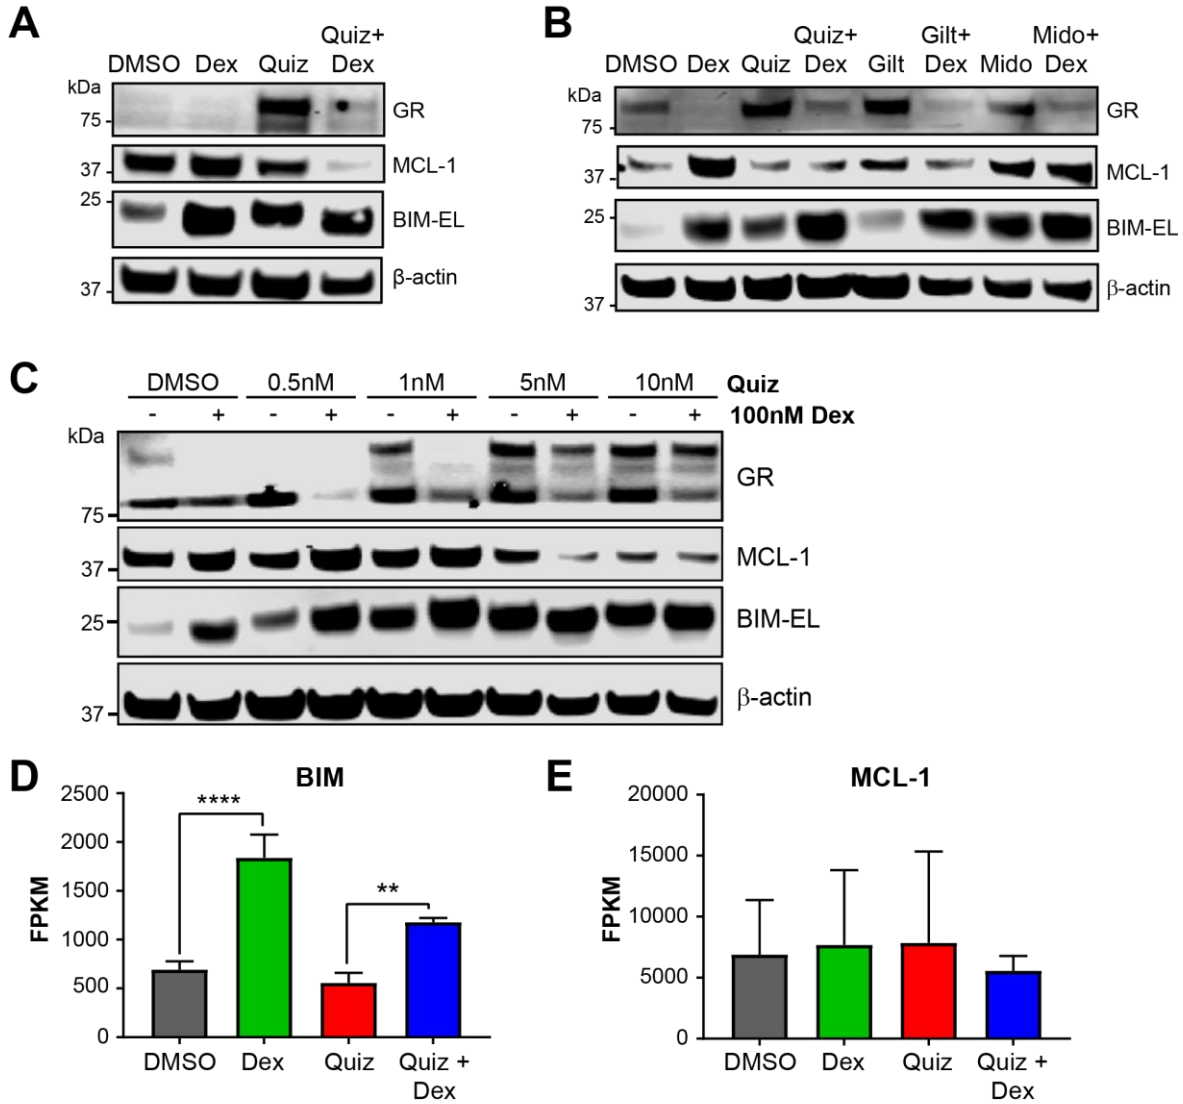

**Supplemental Figure 6.** (A) A representative immunoblot showing the expression of GR, MCL-1 and BIM following treatment of MOLM13 cells with indicated drugs for 48h: 10nM quizartinib (Quiz), 100nM dexamethasone (Dex). (B) A representative immunoblot showing the expression of GR, MCL-1 and BIM following treatment of MV4-11 cells with indicated drugs: 10nM quizartinib, 50nM gilteritinib (Gilt), 100nM midostaurin (Mido) and 100nM dexamethasone for 48h. (C) A representative immunoblot showing the expression of GR, MCL-1 and BIM following treatment of MV4-11 cells with indicated drugs and concentration for 48h. Bar graph showing the gene expression (FPKM from RNA-seq in Figure 3D) of BIM (D) and MCL-1 (E).

| MV4-11    |        | MIK-665 (nM) |                |          |          |          |         |        |       |       |       |       |      |
|-----------|--------|--------------|----------------|----------|----------|----------|---------|--------|-------|-------|-------|-------|------|
|           |        | 0            | 0.009766       | 0.019531 | 0.039063 | 0.078125 | 0.15625 | 0.3125 | 0.625 | 1.25  | 2.5   | 5     | 10   |
| Quiz (nM) | 0      | 100.00       | 105.01         | 104.40   | 101.71   | 100.49   | 95.60   | 94.99  | 82.76 | 68.09 | 46.82 | 25.18 | 7.93 |
|           | 1.5625 | 88.75        | 82.40          | 75.67    | 69.68    | 69.93    | 61.00   | 48.66  | 26.16 | 14.30 | 9.71  | 5.73  | 3.53 |
|           | 3.125  | 69.56        | 62.35          | 61.98    | 56.97    | 55.01    | 43.28   | 34.72  | 11.71 | 12.47 | 6.45  | 4.34  | 4.41 |
|           | 6.25   | 54.52        | 56.60          | 52.44    | 48.78    | 43.15    | 35.94   | 32.40  | 15.16 | 8.69  | 4.56  | 3.69  | 2.16 |
|           | 12.5   | 58.07        | 49.27          | 53.67    | 52.93    | 40.59    | 25.92   | 33.25  | 13.33 | 7.86  | 4.27  | 3.03  | 3.17 |
|           | 25     | 62.59        | 68.46          | 49.63    | 51.83    | 46.21    | 32.52   | 32.76  | 11.17 | 7.16  | 4.89  | 4.65  | 2.05 |
|           | 50     | 51.71        | 63.20          | 58.92    | 65.28    | 48.04    | 34.72   | 20.54  | 8.09  | 6.32  | 2.71  | 5.11  | 2.62 |
|           | 100    | 69.19        | 69.80          | 53.91    | 46.21    | 47.07    | 30.68   | 27.38  | 8.56  | 6.14  | 4.43  | 4.54  | 4.13 |
|           |        |              | % Viable Cells |          |          |          |         |        |       |       |       |       |      |

**Supplemental Figure 7.** The drug combination matrix following FACS cell viability analysis of MV4-11 cells treated with serially diluted quizartinib (Quiz) and MIK-665 for 48 h.
